# Supplementary material for: Catheter Colonization and Abscess Formation Due to Staphylococcus epidermidis with Normal and Small-Colony-Variant Phenotype Is Mouse Strain Dependent
Source: PLoS One. 2012 May 7;7(5):e36602. doi: 10.1371/journal.pone.0036602 (PMC3346766; doi:10.1371/journal.pone.0036602)
Supplement: Table S1 — Colonization of catheters according to dose of three Staphylococcus epidermidis strains in inbred C57BL/6JCrl, outbred Crl:CD1(ICR), and inbred BALB/cAnNCrl mice (DOC) [file pone.0036602.s001.doc]

Table S1

|  | Colonization of catheters (no. of CFUs ± SEM#), strain of mice~, and bacterial dose (CFUs*) | | | | | | | |
| --- | --- | --- | --- | --- | --- | --- | --- | --- |
| Bacteria | C57BL/6JCrl | |  | Crl:CD1(ICR) | |  | BALB/cAnNCrl | |
|  | 106 | 107 |  | 106 | 107 |  | 106 | 107 |
| *S. epidermidis* WT§ | 2±2.1a | 377±307a |  | 0a | 94±36a |  | 205±97a,b | 231±159a |
| *S. epidermidis hemB£* | 153±124a | 130±58a |  | 0a | 80±56a |  | 0a | 5±4a |
| *S. epidermidis* CM+ | 43±35a | 707±606a |  | 0a | 25±21a |  | 41±24a | 1,230±886a |

~four 8-12 week old male mice per bacterial- dose and phenotype were used

* CFUs: colony-forming unit, # SEM: standard error of the mean, § WT: wild type, *£ hemB*: *hemB* knock-out mutant with small-colony-variant phenotype, + CM: complemented mutant of *S. epidermidis hemB*

a-b Values with different superscripts within a row, assigned to the same infectious dose vary significantly (p<0.05; Student’s unpaired *t*-test
